# Supplementary material
Source: PubMed Central journal article supplement (PMC8713069)
Supplement: NIHMS1756179-supplement-1.pdf [file NIHMS1756179-supplement-1.pdf]

**Supplemental Table 1: Activity in the open field (Mean+/-SEM, in m) A/J mice after high doses of fentanyl.**

n=8 per group

|                          | SPONTANEOUS ACTIVITY IN CM<br>(DAY 1) |              | CONDITIONED ACTIVITY IN CM<br>(DAY 3) |              |
|--------------------------|---------------------------------------|--------------|---------------------------------------|--------------|
|                          | 0.25 mg/kg                            | 0.5 mg/kg    | 0.25 mg/kg                            | 0.5 mg/kg    |
| <b>Fentanyl<br/>Dose</b> |                                       |              |                                       |              |
| <b>Male</b>              | 9.1 +/- 1.3                           | 13.2 +/- 2.7 | 26.7 +/- 7.4                          | 32.0 +/- 4.1 |
| <b>Female</b>            | 8.3 +/- 1.5                           | 23.7 +/- 1.5 | 19.7 +/- 5.7                          | 21.6 +/- 2.8 |
